# Supplementary material
Source: HighWire-hosted journal article supplement (https://www.cmajopen.ca/content/suppl/2021/03/19/9.1.E271)
Supplement: 2020-0323-2-at.pdf [file 2020-0323-2-at.pdf]

**Appendix 2. Days between “Case Reported” Date and “Accurate Episode” Date in CCM Plus**

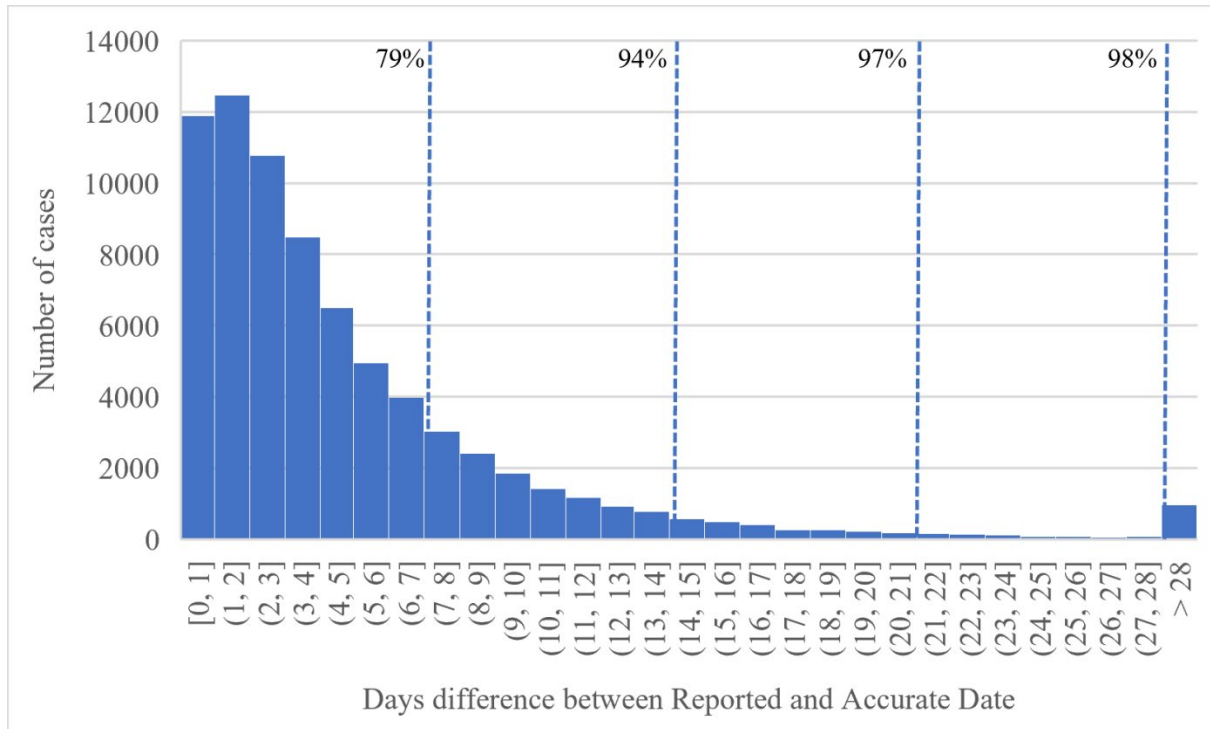

This graph describes the difference in the number of days between the “case reported” date and “accurate episode” date in the CCM plus dataset for all individuals. The dotted lines with percentages represent the cumulative number of cases with up to that difference. From this graph, 94% of cases have an accurate episode date 14 days after their case reported date.
