# Supplementary material
Source: HighWire-hosted journal article supplement (https://www.cmajopen.ca/content/suppl/2021/03/19/9.1.E271)

**Appendix 10. Distribution of length of stay for patients admitted to intensive care unit (ICU) care for all individuals between March 1 and September 30, 2020**

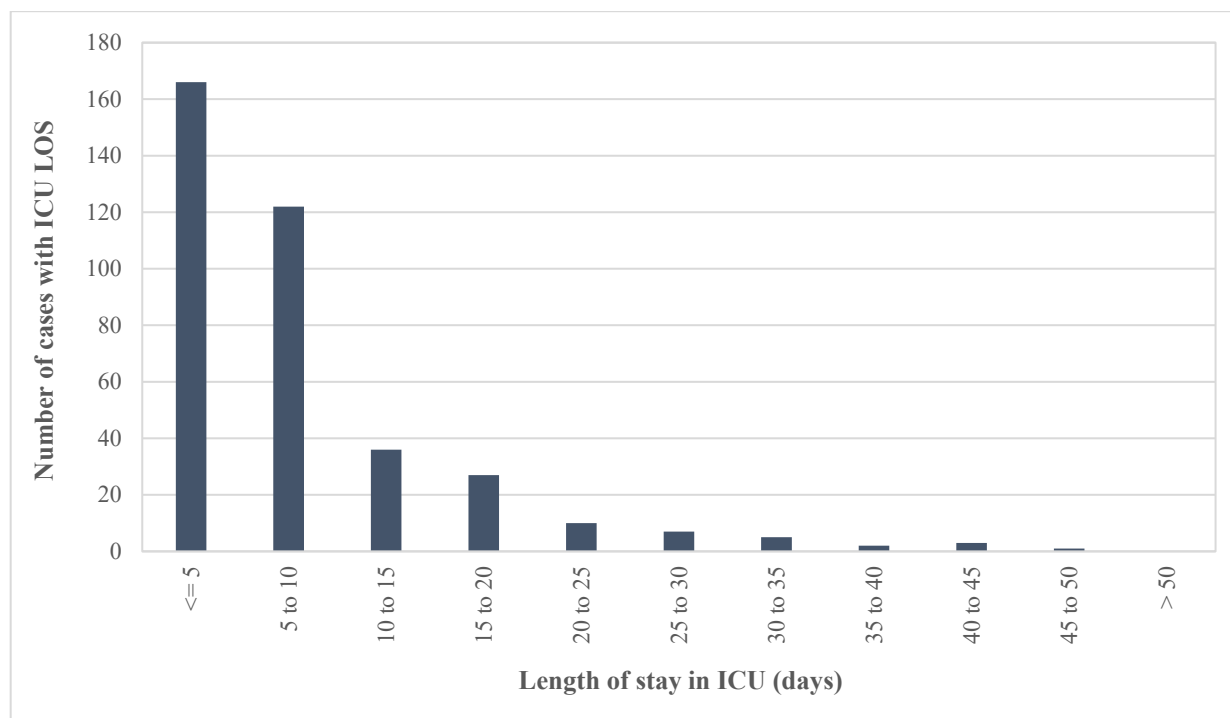

Supplement: 2020-0323-10-at.pdf [file 2020-0323-10-at.pdf]
